# Supplementary material for: Auditory Neuropathy after Damage to Cochlear Spiral Ganglion Neurons in Mice Resulting from Conditional Expression of Diphtheria Toxin Receptors
Source: PubMed Central journal article supplement (PMC5527113; doi:10.1038/s41598-017-06600-6), 2017-07-25
Supplement: 41598_2017_6600_MOESM1_ESM.pdf [file 41598_2017_6600_MOESM1_ESM.pdf]

# Auditory Neuropathy after Damage to Cochlear Spiral Ganglion Neurons in Mice Resulting from Conditional Expression of Diphtheria Toxin Receptors

Haolai Pan<sup>1</sup>, Qiang Song<sup>1</sup>, Yanyan Huang<sup>1</sup>, Jiping Wang<sup>1</sup>, Renjie Chai<sup>2</sup>, Shankai Yin<sup>1\*</sup>, Jian Wang<sup>1,3\*</sup>

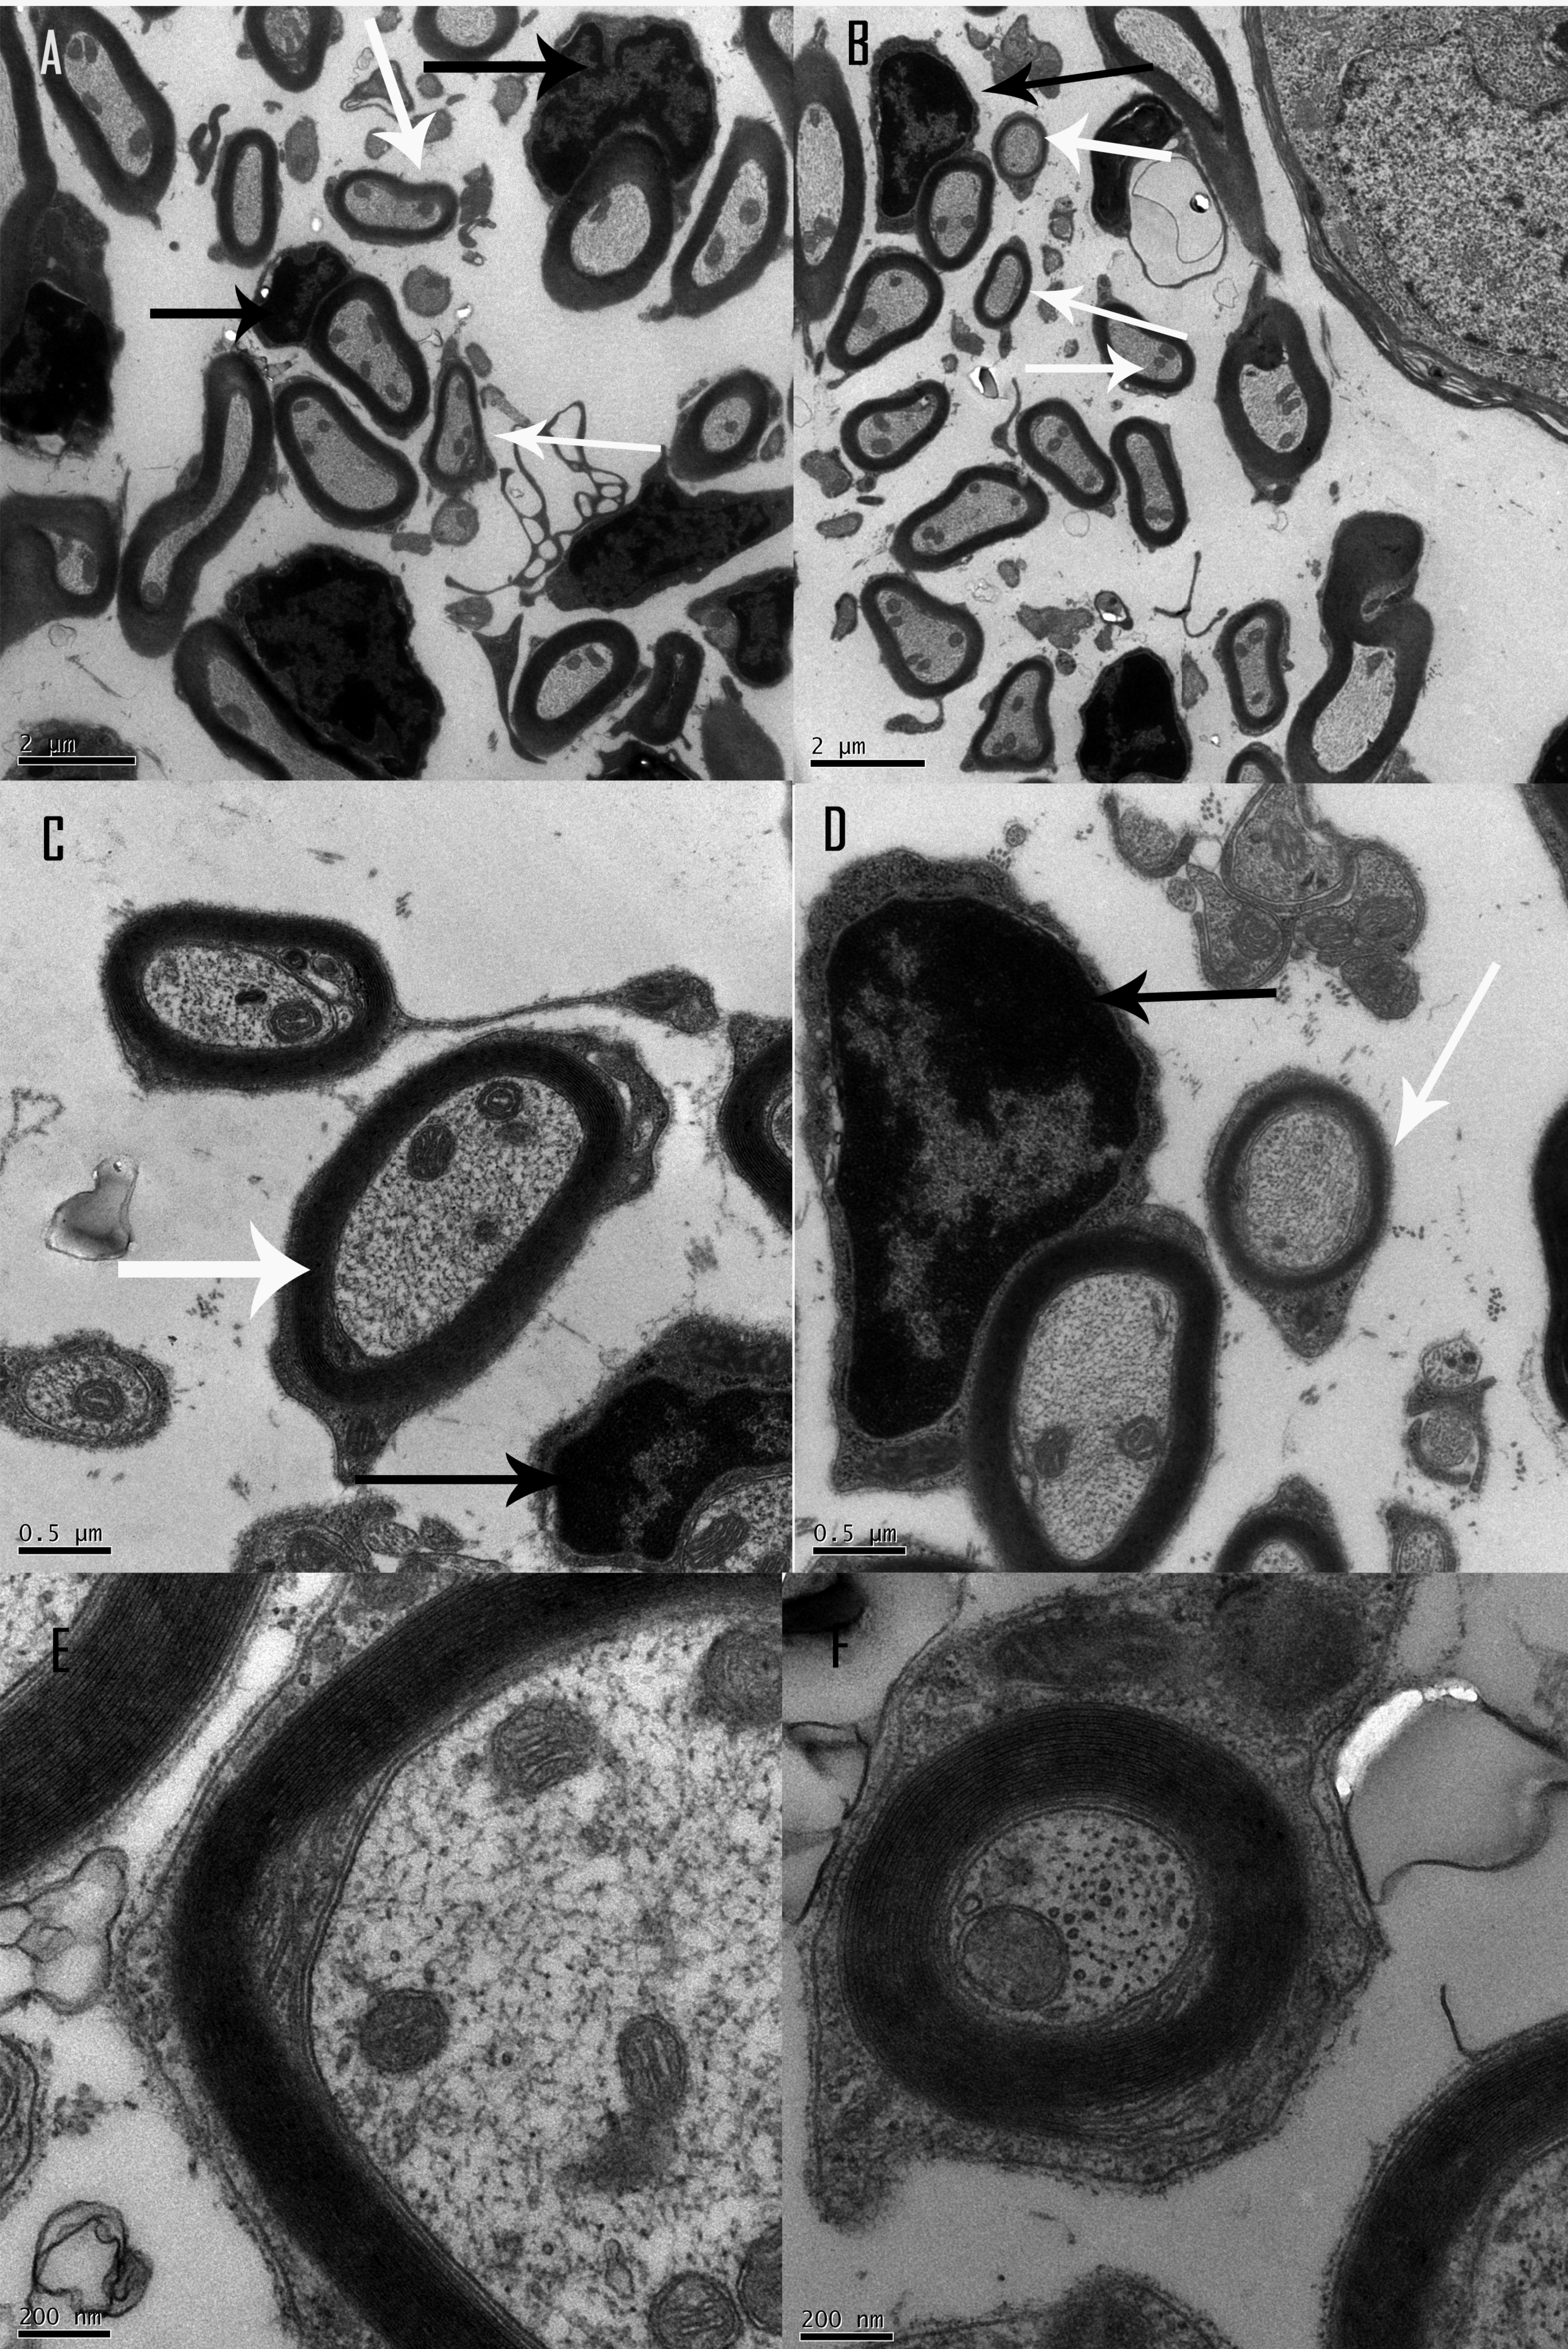

**sFigure S1. More TEM images of ANF from samples of the Cre<sup>+</sup> group.**

Black arrows pointed to Schwann cells that were extremely swollen, probably were in the process of apoptosis of Schwann cells. White arrows pointed to the myelin sheath with different thickness. The cross-section of fibers showed different shapes.
